# Supplementary material for: Monoreduced [M(R,R′timdt)2]−dithiolenes (M = Ni, Pd, Pt; R,R′timdt = disubstituted imidazolidine-2,4,5-trithione): solid state photoconducting properties in the third optical fiber window
Source: Royal Society of Chemistry journal article supplement (doi:10.1039/b406406b), 2004-01-01
Supplement: b406406b.doc [file b406406b.doc]

**Monoreduced [M(R,R'timdt)2]– Dithiolenes (M = Ni, Pd, Pt; R,R'timdt = disubstituted imidazolidine-2,4,5-trithione): Solid State Photoconducting Properties in the Third Optical Fiber Window**

M. Carla Aragoni,a Massimiliano Arca,a,* Mario Caironi,c Carla Denotti,a Francesco A. Devillanova,a Emanuela Grigiotti,b Francesco Isaia,a Franco Laschi,b Vito Lippolis,a Dario Natali,c Luca Pala,a Marco Sampietro,c Piero Zanellob

a Dipartimento di Chimica Inorganica ed Analitica,Università degli Studi di Cagliari, S.S. 554 bivio per Sestu, 09042 Monserrato – Cagliari, Italy. E-mail: marca@unica.it; Fax: +39 070 675 4456; Tel: +39 070 675 4483

b Dipartimento di Chimica, Università degli Studi di Siena, Via A. Moro, 53100 Siena, Italy

c Dipartimento di Elettronica e Informazione, Politecnico di Milano, P.za L. da Vinci 32, 20133, Milano, Italy and INFN, sez. di Milano, Via Celoria 16, 20133 Milano, Italy

Electronic Supplementary Information (ESI)

**Device Specifications**

Devices were prepared by casting a CH2Cl2 solution of the active material on a hot 500m thick SiO2 substrate where a chromium micro-lithography was previously provided: a low capacitive planar metal-semiconductor-metal configuration was obtained (Fig. S1) with interelectrode spacings of 12 m and an effective width of 15mm. We irradiated our prototype photodetectors with a set of light emitting diodes. Device responsivity (Fig. 2 in the paper) was measured by biasing with a voltage source and connecting the device to a transimpedance amplifier, as shown in Fig. S1; light pulses lasted 500s. In order to measure the time response to an impinging train of light pulses (Fig. 3 in the paper), the amplifying chain was enhanced by connecting a band pass filter to the output of the transimpedance amplifier in order to increase the signal-to-noise ratio.

**Fig. S1** Schematic representation of the planar configuration adopted for the photodetector, biased and connected to a transimpedance amplifier (left); top view of the interdigitated geometry adopted (right).

**
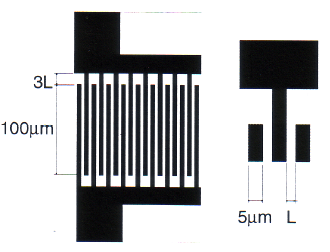
**

**SiO2**

Band Pass Filter

**Fig. S2** Frontier KS-molecular orbital diagram and symmetry representations of the molecular orbitals involved in the NIR transition for [Pt(H2timdt)2]0/–

**
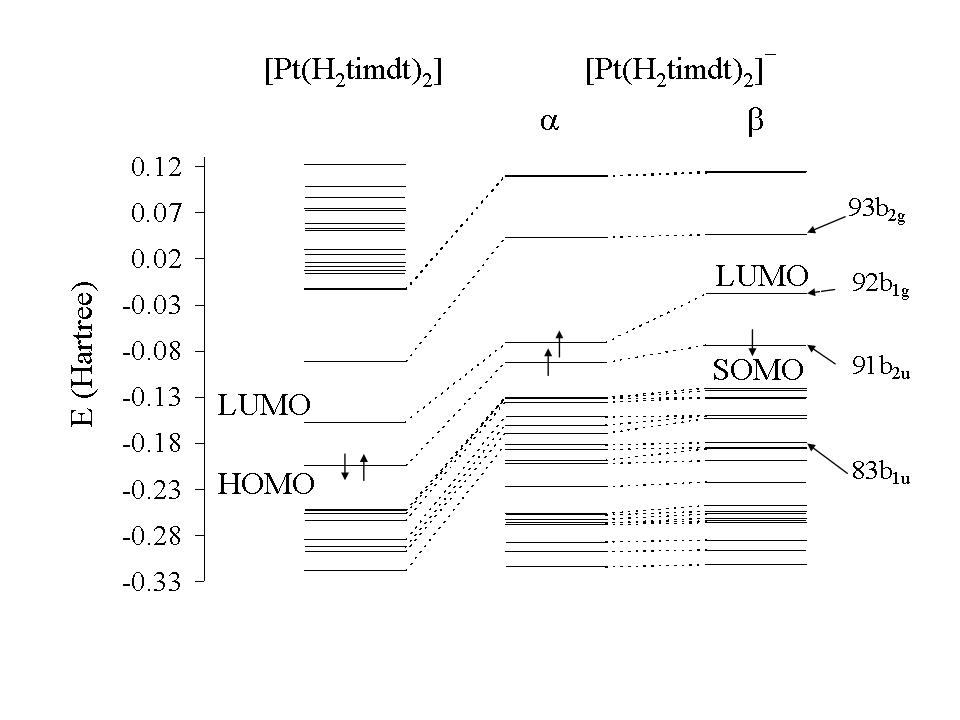
**
